# Differential Hepatic Metal and Metallothionein Levels in Three Feral Fish Species along a Metal Pollution Gradient

Lieven Bervoets<sup>1\*</sup>, Dries Knapen<sup>1,2</sup>, Maarten De Jonge<sup>1</sup>, Karen Van Campenhout<sup>3</sup>, Ronny Blust<sup>1</sup>

**1** Department of Biology, Systemic Physiological & Ecotoxicological Research, University of Antwerp, Antwerp, Belgium, **2** Laboratory for Veterinary Physiology, Department of Veterinary Sciences, University of Antwerp, Antwerp, Belgium, **3** Department of Environment and Health, Flemish Government, Brussels, Belgium

## Abstract

The accumulation of cadmium, copper and zinc and the induction of metallothioneins (MT) in liver of three freshwater fish species was studied. Gudgeon (*Gobio gobio*), roach (*Rutilus rutilus*) and perch (*Perca fluviatilis*) were captured at 6 sampling sites along a cadmium and zinc gradient and one reference site in a tributary of the Scheldt River in Flanders (Belgium). At each site up to 10 individuals per species were collected and analyzed on their general condition factor (K), hepatosomatic index (HSI) and gonadosomatic index (GSI). From each individual fish the liver was dissected and analyzed on Cd, Cu and Zn and MT-content. Although not all species were present at each site, hepatic Cd and Zn levels generally followed the pollution gradient and highest levels were measured in perch, followed by roach and gudgeon. Nevertheless also an effect of site was observed on this order. MT-levels appeared to be the highest in gudgeon although differences with the other species were not very pronounced and depended on the site. Significant relationships were found between hepatic zinc accumulation and MT levels. For each species the ratio  $MT_{\text{theoretical}}/MT_{\text{measured}}$  was calculated, which gives an indication of the relative capacity to induce MTs and thus immobilize the metals. Perch had the lowest capacity in inducing MTs (highest ratio). Relationships between hepatic metal levels and fish condition indices were absent or very weak.

**Citation:** Bervoets L, Knapen D, De Jonge M, Van Campenhout K, Blust R (2013) Differential Hepatic Metal and Metallothionein Levels in Three Feral Fish Species along a Metal Pollution Gradient. PLoS ONE 8(3): e60805. doi:10.1371/journal.pone.0060805

**Editor:** Sandra Maria Feliciano de Oliveira Azevedo, Federal University of Rio de Janeiro, Brazil

**Received:** November 8, 2012; **Accepted:** March 3, 2013; **Published:** March 28, 2013

**Copyright:** © 2013 Bervoets et al. This is an open-access article distributed under the terms of the Creative Commons Attribution License, which permits unrestricted use, distribution, and reproduction in any medium, provided the original author and source are credited.

**Funding:** This work was sponsored by two projects of the Flemish Government (VLINA/9903 and VLINA/0004). MDJ is supported by the Agency for Innovation by Science and Technology. The funders had no role in study design, data collection and analysis, decision to publish, or preparation of the manuscript.

**Competing Interests:** The authors have declared that no competing interests exist.

\* E-mail: lieven.bervoets@ua.ac.be

## Introduction

Despite a decrease in discharges of metals in most West-European countries, including Belgium, several water courses are still historically contaminated with metals [1–3], potentially affecting different stages of the aquatic food chain. Fish are interesting species for the evaluation of biological effects of metal pollution under natural circumstances because they might accumulate metals from water, sediment as well as food [4–6]. However, accumulation of metals does not necessarily indicate deleterious effects since organisms have possibilities to protect themselves from metal toxicity by increased excretion, differential allocation among organs and by binding the metals intracellularly [7–9]. Metallothioneins (MTs) are low-molecular weight, heat-stable and cysteine-rich proteins involved in the binding and regulation of essential metals such as copper and zinc, and the detoxification of non-essential metals such as cadmium and mercury [10]. The induction of MTs as a response to elevated levels of waterborne and dietary metal exposure, has been frequently used as a biomarker for metal exposure, both under laboratory and field conditions [7,11–20]. Fish species that differ in their feeding strategies and/or detoxification capacities might accumulate metals to a different extent [21–24]. Bottom dwelling species such as the gudgeon (*Gobio gobio*) will be exposed to water, sediment and food whereas pelagic species are mainly exposed via water and food.

As a consequence, given the different way of exposure, both metal accumulation and MT-induction might differ among

different species [13,25], which might be responsible for differences in sensitivity to metals [26,27].

In order to relate possible differences in MT levels to differences in sensitivity multiple effects on fish can be studied. Integrative measures such as condition factor and hepatosomatic index can provide valuable information concerning the overall effect of pollutants on individual fish [28–31] and can be related to both metal and MT levels in fish tissues.

The aim of this study was to assess whether different fish species living along a Cd and Zn pollution gradient differentially accumulate metals and induce MTs. Three species were investigated; the bottom dwelling gudgeon (*Gobio gobio*), roach (*Rutilus rutilus*) an invertivorous fish and perch (*Perca fluviatilis*) a piscivorous fish. Metal and MT levels in liver were compared among species and environmental metal concentrations were related to accumulated levels. Furthermore it was investigated whether differences in accumulated metals and induced MTs resulted in different condition. Condition indices that were measured are hepatosomatic index, gonadosomatic index and condition factor.

## Materials and Methods

### Ethics Statement

The study was conducted in accordance to national and international guidelines (directive 2007/526/EC of the European Commission) for the protection of animal welfare. All necessary permits were obtained for the described field studies. Permission to catch fish with electrofishing and to sacrifice a limited number of

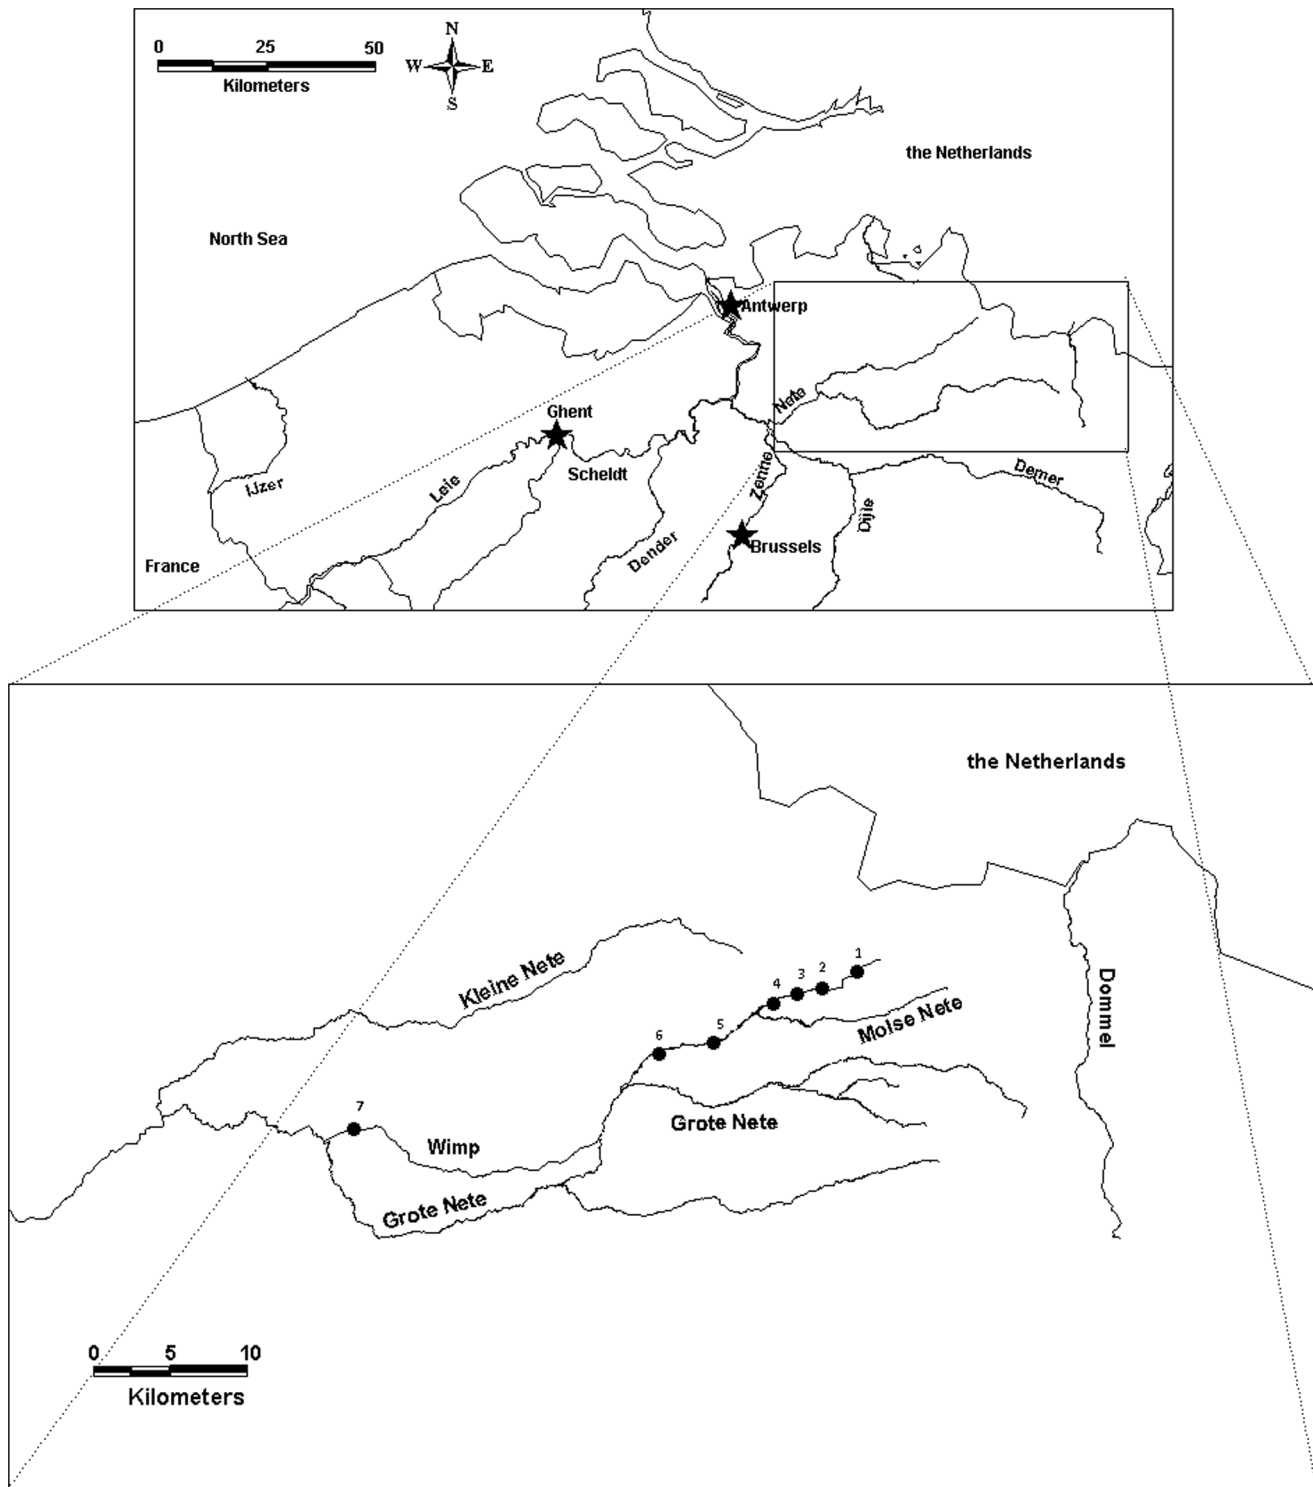

**Figure 1. Map of the sampling sites.**  
doi:10.1371/journal.pone.0060805.g001

each species at each location was obtained from the Flemish Government (LNE/Department of Environment, Nature and Energy).

**Study area and sampling design**

Six sampling sites were selected along the River Moise Nete, located in Flanders (Belgium) and belonging to the basin of the River Scheldt. In addition a reference site was sampled (site 7) at the River Wimp, belonging to the same basin (Fig 1). Sampling sites 1–6 are situated along an existing cadmium and zinc

**Table 1.** Average water quality characteristics at the different sampling sites.

| Site | O <sub>2</sub> mg/l | pH      | SO <sub>4</sub> <sup>2-</sup> mg/l | Cl <sup>-</sup> mg/l | NO <sub>3</sub> <sup>-</sup> +<br>NO <sub>2</sub> <sup>-</sup> -N | NH <sub>4</sub> <sup>+</sup> -N mg/l | PO <sub>4</sub> <sup>3-</sup> -P<br>mg/l | Cond. μS/<br>cm | Cd μg/l | Cu μg/l | Zn μg/l |
|------|---------------------|---------|------------------------------------|----------------------|-------------------------------------------------------------------|--------------------------------------|------------------------------------------|-----------------|---------|---------|---------|
| 1    | 8.2                 | 7.2     | 82                                 | 51                   | 2.2                                                               | 0.26                                 | 0.05                                     | 461             | 3.9     | 4.1     | 712     |
| 2    | 9.3                 | 7.2     | 85                                 | 42                   | 2.0                                                               | 0.23                                 | 0.05                                     | 457             | 62      | 8.3     | 5539    |
| 3    | 8.5                 | 7.1     | 77                                 | 39                   | 1.7                                                               | 0.41                                 | 0.08                                     | 409             | 38      | 6.1     | 3853    |
| 4    | 8.6                 | 7.2     | 95                                 | 38                   | 1.6                                                               | 0.35                                 | 0.09                                     | 409             | 58      | 8.1     | 4864    |
| 5    | 9.3                 | 7.3     | 61                                 | 37                   | 1.5                                                               | 0.68                                 | 0.11                                     | 376             | 17      | 5.7     | 1762    |
| 6    | 8.7                 | 7.3     | 57                                 | 36                   | 2.6                                                               | 0.88                                 | 0.16                                     | 380             | 8.4     | 5.4     | 922     |
| 7    | 7.6                 | 6.8     | 60                                 | 53                   | 1.6                                                               | 2.2                                  | 0.13                                     | 391             | < 0.10  | 3.5     | 62      |
| CQC  | 5.5-9.5             | 6.5-9.0 | 500                                | 250                  | NA                                                                | *                                    | NA                                       |                 | 0.02    | 24      | 30      |
| FQC  | ≥ 5.0               | 6.5-8.0 | 250                                | 200                  | 10.0                                                              | 1.0                                  | 0.30                                     | 1000            | 1.0     | 50      | 200     |

CQC: Canadian Quality Criteria for aquatic freshwater life [65] FQC: Flemish Quality Criteria [66] NA: Not Available; \* pH-dependent; ND: Not Determined  
doi:10.1371/journal.pone.0060805.t001

concentration gradient with the highest metal concentrations measured at site 2 [28,31,32]. Water characteristics such as oxygen level, pH, water hardness and water temperature (4.6–6 °C) were within the same range for all sites (table 1).

Water samples were collected in duplicate monthly between November and March 2001–2002 at all sampling stations. To measure the total metal concentrations water samples were acidified with nitric acid (HNO<sub>3</sub>; 69%) to a pH of 2.0 and filtered through a 0.45-μm Millipore (Bedford, MA, USA) membrane filter. All samples were stored in 20-ml polypropylene vials at 4 °C until analysis. Sediments were collected twice, i.e. in December and in February. Samples were taken with a 'Petit Ponar' grab sampler (Wildco cat.no. 1728; 235 cm<sup>2</sup>). At each site a mixed sample was taken, composed of 5 grab samples [33]. Samples were sieved with the site-water using a 500 μm-mesh sieve and stored in 500 ml polyethylene beakers at 4 °C. Subsequently, supernatant was decanted carefully to prevent loss of sediment. After decantation the sediment sample was homogenised with a plastic spatula. Prior to extraction the sediment of each sampling station was centrifuged (10,000 g) to collect the pore water [34]. The remaining wet sediment was analysed on total metal content: sediments were dried at 60 °C during 48 hours and a mixture of concentrated HNO<sub>3</sub> and HCl (4:1) was added. Eventually, samples were put in Teflon bombs and digested in a microwave oven [28,35].

At all sampling sites fish were caught within one month between December and January by electrofishing, using an Electra catch WFC7 generator producing 150 V. Three successive samplings were conducted at each site (length: ± 100 m). All fish were identified to the species level and counted. Of all specimens, forklength was measured (± 1 mm) and weight determined using a Kern 442.43 balance (± 0.1 g).

From each sampling site up to 8 specimens (if present) of three fish species, i.e. gudgeon (*Gobio gobio*), perch (*Perca fluviatilis*), and roach (*Rutilus rutilus*), were sacrificed using an overdose of the anesthetic ethyl meta-aminobenzoate methanesulfonic acid (MS 222) and liver tissues were collected and weighed (0.001 g) in the field and immediately stored in liquid nitrogen and transported to the lab. In the lab, the liver was homogenized and separated in two parts, one part for determination of metal concentrations stored at -20 °C and one part for metallothionein determination stored at -80 °C. Tissue samples for metal determination were put in acid-washed polypropylene pre-weighted vials and dried for 24 h at 60 °C. Subsequently, the biological material was digested with

a mixture of concentrated ultrapure HNO<sub>3</sub> and hydrogen peroxide (H<sub>2</sub>O<sub>2</sub>; 29%) (3:1; v/v) in a microwave oven and stored until measurement [28].

### Chemical measurements

Water quality characteristics (pH; temperature (°C); conductivity (μS/cm); oxygen (mg/l)) were measured on-site and at each sampling moment with a WTW multiline F/SET-3 field kit. Chloride, sulphate, phosphate, ammonium, nitrate and nitrite were determined using an automated analyser (Skalar: FAS, SA 20/40).

Cadmium, copper, and zinc were measured in the surface water, sediment pore water, bulk sediment and fish tissue samples with either an Inductively Coupled Plasma-Atomic Emission Spectrometer (ICP-AES, Varian Liberty Series II, Victoria, Australia) equipped with a micro concentric groove nebulizer [36] or an Inductively Coupled Plasma-Mass Spectrophotometer (ICP-MS, Varian UltraMass 700, Victoria, Australia).

Concentrations of the metals in the water are expressed in μmol l<sup>-1</sup>, the liver metal concentrations are expressed on a wet weight (wet/wet) basis in nmol g<sup>-1</sup>. The accuracy of the metal determination was verified using certified reference material of the Community Bureau of Reference (EU), i.e. standard for trace elements in river sediment (CRM 320) and mussel tissue (CRM 278). Recoveries were within 10 % of the certified values.

### Metallothionein determination

After thawing, the tissue samples were homogenized using an Ultra-turrax T8 (IKA, Labortechnik, Staufen, Germany) in 3 volumes (v/w) of 10 mM Tris-HCl buffer (pH 7.4) containing 5 mM β-mercaptoethanol (to prevent oxidation), and 0.1 mM phenylmethanesulfonylfluoride (PMSF, protease inhibitor). Tris-(hydroxymethyl)-aminomethane (Tris), PMSF, and β-mercaptoethanol were obtained from Sigma (Sigma-Aldrich, St. Louis, MO, USA). The samples were centrifuged at 9000 g and 4 °C for 10 min. (Eppendorf Centrifuge 5804R, Hamburg, Germany) and ultra centrifuged at 100 000 g for 60 min. at 4 °C (Sorval Discovery TM 90 Ultra speed centrifuge, Newton, Connecticut, USA). Aliquots of supernatants (cytosolic fractions) were stored at -80 °C for a period not longer than 24 hrs before use. Total cytosolic MT concentrations were measured using the cadmium thiomolybdate saturation assay from Klein *et al.* [37].

The general concept of this assay is to remove all MT-bound Cd, Cu, and Zn ions and, subsequently, to saturate the MT

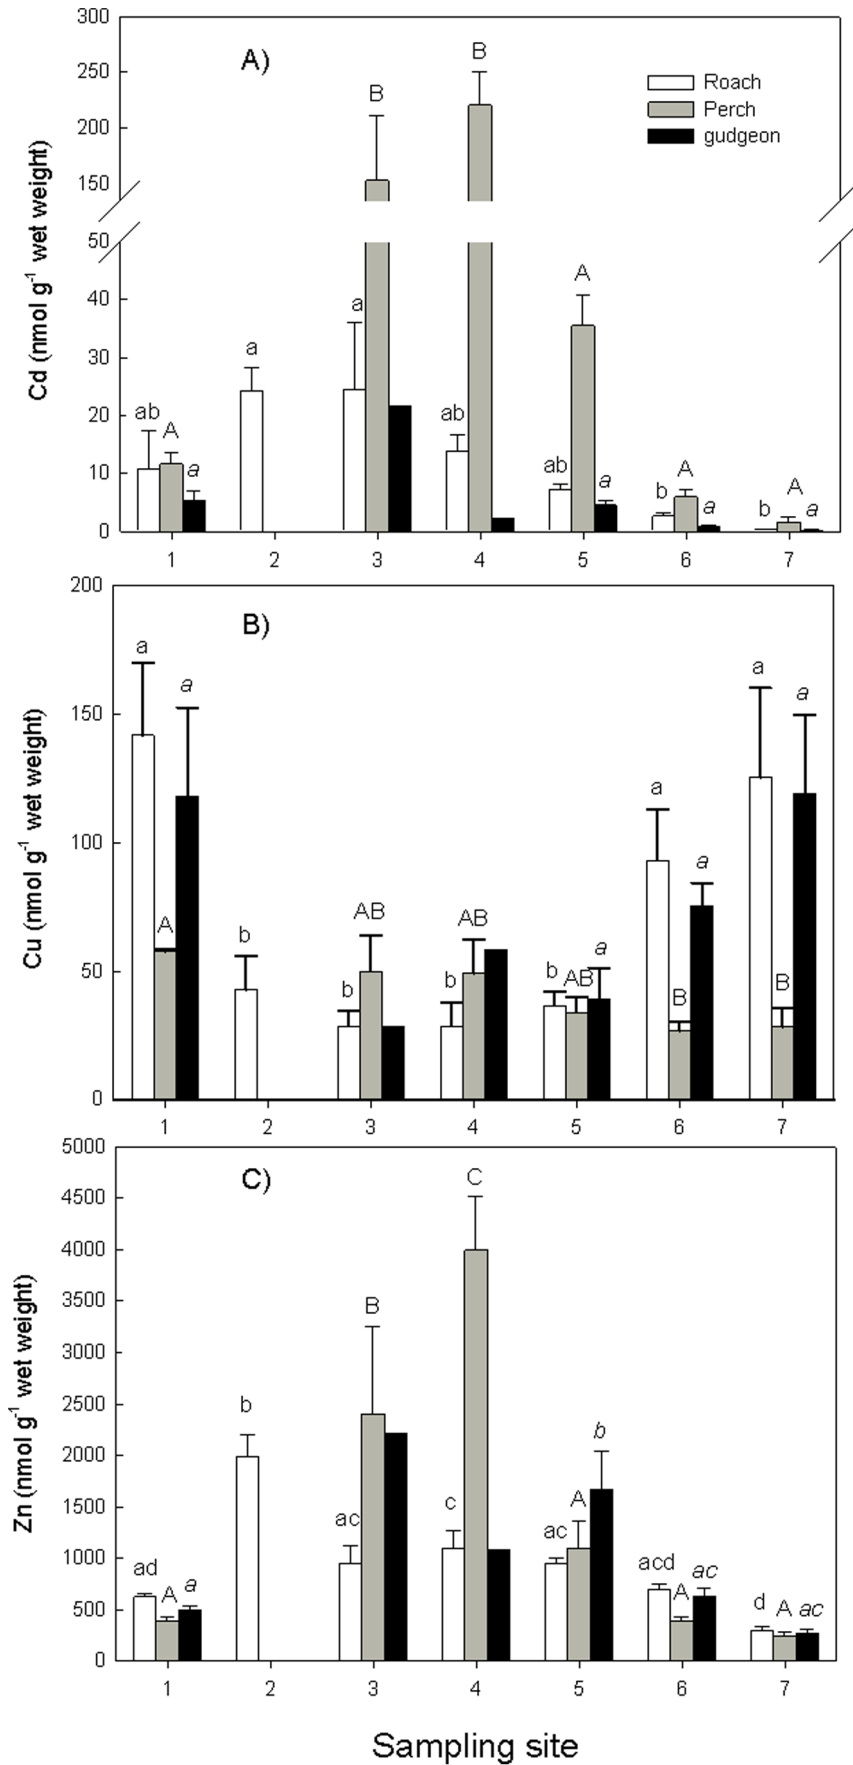

**Figure 2. Mean metal concentration (± standard deviation) in liver of the three fish species in µg g<sup>-1</sup> dry weight.** (a) Cd, (b) Cu, (c) Zn. Different letters (A, a or *a* for respectively Roach, Perch and Gudgeon) mean significant differences in hepatic tissue within a species (p < 0.05). doi:10.1371/journal.pone.0060805.g002

molecules with the <sup>109</sup>Cd isotope, which was quantified using a Minaxi-Autogamma 5530 counter (Canberra Packard, Boston, MA, USA). The excessive <sup>109</sup>Cd was complexed by Chelex-100 (Merck, Darmstadt, Germany). The MT concentrations were calculated on the basis of a molar ratio of Cd/MT of 7 [38]. It has been shown that this method compares very well with other established techniques such as ELISA or the Ag-saturation method [39].

Measuring MT concentrations using the cadmium thiomolybdate saturation assay of Klein et al. [37] allows the determination of MT binding places including the ones initially occupied by Cu, Cd and Zn. Measured MT concentrations in liver were compared to Cu, Cd and Zn concentrations measured in those tissues. In order to investigate differences in detoxification capacities among the three fish species, the theoretical level of MT needed to bind all the present Cd, Cu and Zn in the liver was calculated for the three species. Based on the specific binding capacity of the thiol groups of MT for the three metals (7 mol Cd, 12 mol Cu and 7 mol Zn/mol MT, Kito et al. [38]) the following equation was used:  $MT_{theoretical} = [Cd]_{tissue}/7 + [Cu]_{tissue}/12 + [Zn]_{tissue}/7$ . The ratio  $MT_{theoretical}/MT_{measured}$  (further referred to as  $MT_t/MT_m$ ) provides an indication of how efficient an organism is inducing MTs after exposure to metals.

**Condition indices**

The relative condition factor (K) was calculated according to the formula  $K = W/W^*$  [40,41], where the observed weight of an individual fish (W in g) is compared to its expected weight (W\*) based on its observed length (L). This expected weight is derived from the length-weight regressions  $W = aL^b$ , with *a* and *b* as fitting constants from reference populations of each studied species. K indicates whether an individual of a species is in a better (>1) or worse (<1) condition compared to an average individual of the same length in a reference population.

The Hepatosomatic Index (HIS) and Gonadosomatic Index (GSI) were calculated by comparing the respective organ weights to the total body weight (organ weight/total body weight x 100).

**Statistical analysis**

ANOVA (Analysis of Variance) and Duncan’s multiple range tests were used to determine the significance of the differences between the different sampling sites. If the data were not normally distributed or showed heterogeneous variances, they were log transformed to get homogeneous variances and a normal distribution. Multiple linear regressions were used to construct empirical models to relate exposure concentrations to the tissue metal concentrations and the tissue MT concentrations. All statistical analyses were performed using the software package STATISTICA (StatSoft Inc., Tulsa).

**Results**

Table 1 summarizes the results of the water quality characteristics from the different sampling sites. General water quality characteristics all met the Flemish and international water quality standards. Total Cd and Zn levels clearly followed a gradient between site 2 and site 7. For copper no pattern was observed. Cd and Zn levels exceeded quality standards at all sites, including site 1 upstream of the pollution source but except the reference site,

Table 2 gives the results of the sediment and pore water analysis. Cadmium and Zn concentrations in the sediment did not follow the same gradient as for the dissolved metals but also exceeded quality standards. Highest levels of both metals were measured more downstream of the pollution source. At the downstream sites increased copper levels were measured although nowhere the quality standards were exceeded.

For each species fish of comparable size were selected for analysis (total length: roach: 13.9 ± 2.8 cm; gudgeon: 11.1 ± 1.6; perch: 14.0 ± 5.6 cm). Roach could be captured in sufficient numbers at all sites. Gudgeon however, was absent at site 2 and only one specimen was captured at sites 3 and 4. Perch was absent at site 2. In total, metal and MT levels in the liver could be measured in 45 roach, 23 perch and 33 gudgeons captured in the pollution gradient.

Figure 2 shows the results of the Cd, Cu and Zn concentrations in the liver of the three fish species caught at the different sampling. The average wet weight/dry weight ratios for the liver were 3.63 ± 0.39, 3.85 ± 0.31, 3.05 ± 0.60 for Roach, Perch and

**Table 2. Total metal levels in the sediments and the pore water at the different sampling sites.**

| Site | Cd-sed µg/g dw | Cu-sed µg/g dw | Zn-sed µg/g dw | Cd-pw µg/l | Cu-pw µg/l | Zn-pw µg/l |
|------|----------------|----------------|----------------|------------|------------|------------|
| 1    | 1.88           | 1.64           | 89.7           | 1.23       | 0.43       | 26.4       |
| 2    | 19.3           | 2.56           | 313            | nd         | nd         | nd         |
| 3    | 35.3           | 3.15           | 1431           | 4.95       | 1.14       | 1275       |
| 4    | 51.6           | 6.78           | 1625           | 2.05       | 1.55       | 341        |
| 5    | 40.8           | 18.6           | 2306           | 1.43       | 0.42       | 95.0       |
| 6    | 51.8           | 35.7           | 2634           | 1.19       | 1.29       | 555        |
| 7    | 0.27           | 9.17           | 177            | 0.12       | 2.80       | 17.0       |
| CCC  |                |                |                | 2.2        | 9.0        | 120        |
| PEC  | 3.5            | 197            | 315            |            |            |            |

Sed: sediment; pw: pore water  
 CCC: Criterion Continuous Concentration [43] aquatic freshwater life; ND: Not Determined  
 PEC: Probable Effect Concentrations [42].  
 doi:10.1371/journal.pone.0060805.t002

**Table 3.** Two-way analysis of variance for the effect of species and site on hepatic metal levels.

| Source of variation | df | Mean of Squares | F <sub>s</sub>     |
|---------------------|----|-----------------|--------------------|
| <b>Cadmium</b>      |    |                 |                    |
| Species             | 2  | 17932           | 90.7***            |
| site                | 4  | 8017            | 40.5***            |
| Interaction         | 8  | 10695           | 54.1***            |
| <b>Zinc</b>         |    |                 |                    |
| Species             | 2  | 689305          | 2.23 <sup>ns</sup> |
| site                | 4  | 4287589         | 13.9***            |
| Interaction         | 8  | 893124          | 2.89**             |
| <b>Copper</b>       |    |                 |                    |
| Species             | 2  | 22891           | 9.10***            |
| site                | 4  | 15777           | 6.27***            |
| Interaction         | 8  | 2744            | 1.09 <sup>ns</sup> |

doi:10.1371/journal.pone.0060805.t003

Gudgeon respectively. The effect of site and species was analyzed with a two-way ANOVA. Because not all species were present at all sites this two-way ANOVA could be applied only on fish from sites 1, 5, 6 and 7. One-way ANOVA, followed by a Duncan's multiple range test, was used to compare the levels among the sites per species. For Cd there was a significant effect of site and species and a significant interaction (table 3). Highest cadmium levels were measured in liver of perch at site 5. Considering the species separately, in roach highest hepatic cadmium levels were measured at site 2 and 3, in perch at site 3 and 5 and in gudgeon at site 3 (no perch or gudgeon were caught at site 2). Also for Cu there was a significant effect of site and species but no significant interaction (table 3) with highest levels in roach and gudgeon at the

**Table 4.** Two-way analysis of variance for the effect of species and site on hepatic Metallothioneine levels.

| Source of variation | df | Mean of Squares | F <sub>s</sub> |
|---------------------|----|-----------------|----------------|
| Species             | 2  | 2214            | 16.5***        |
| site                | 4  | 3852            | 28.8***        |
| Interaction         | 8  | 688             | 5.14***        |

doi:10.1371/journal.pone.0060805.t004

sites 1, 6 and 7. For gudgeon however, no significant differences among sites were observed and also for perch differences were less pronounced with significant lower levels at site 6 and 7 compared to site 1 (Figure 2B). For zinc again there was a significant effect of species and site and a significant interaction (table 3). Significant highest zinc levels were measured in liver of perch at site 3 and 4. Looking at the individual species the pattern found was comparable to cadmium with for roach highest levels at site 2, for perch highest levels at site 4 and for gudgeon highest levels at site 5.

Figure 3 shows the hepatic MT levels in the 3 species at the different sites. The effect of site and species on MT levels was analyzed with a two-way ANOVA. Because no sufficient numbers of all species could be captured at all sites, this two-way ANOVA could be applied only on fish from sites 1, 5, 6 and 7. Significant effects of site and species and a significant interaction were found (table 4). Significant highest hepatic MT levels were found in gudgeon from site 5. When the MT levels in the individual species were compared among sites, in roach highest levels were found at sites 2 and 3, in perch at 3 and 4 and in gudgeon at site 3, but here only one individual was captured.

Multiple regression analysis linking measured MT concentrations to Cu, Cd and Zn concentrations in liver showed strong relationships for all three species with R<sup>2</sup> of 0.63; 0.92 and 0.61 for roach, perch and gudgeon respectively. However, the only metal

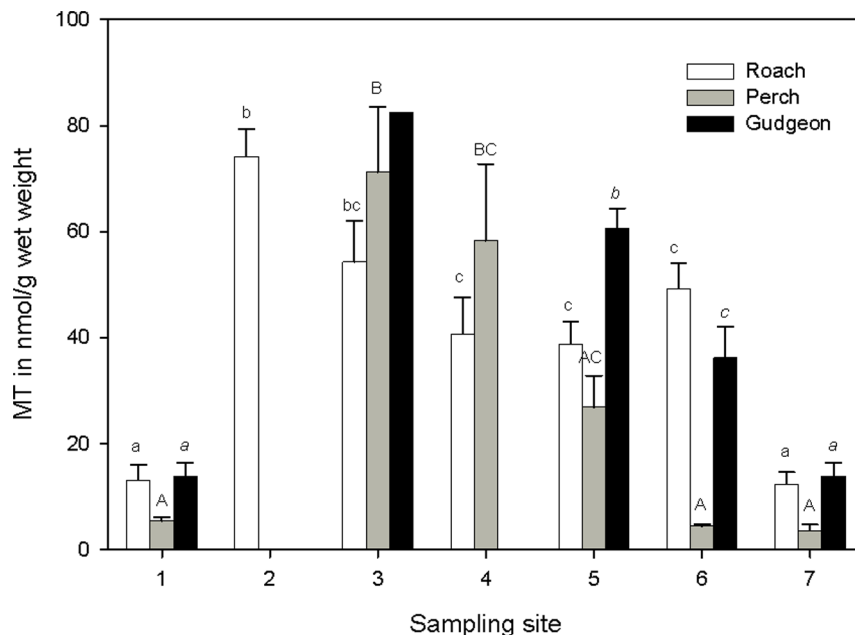

**Figure 3. Metallothionein level (MT) in liver of the three fish species (nmol MT g<sup>-1</sup> wet weight).** Different letters (A, a or a for respectively Roach, Perch and Gudgeon) mean significant differences in hepatic tissue within species (p < 0.05). doi:10.1371/journal.pone.0060805.g003

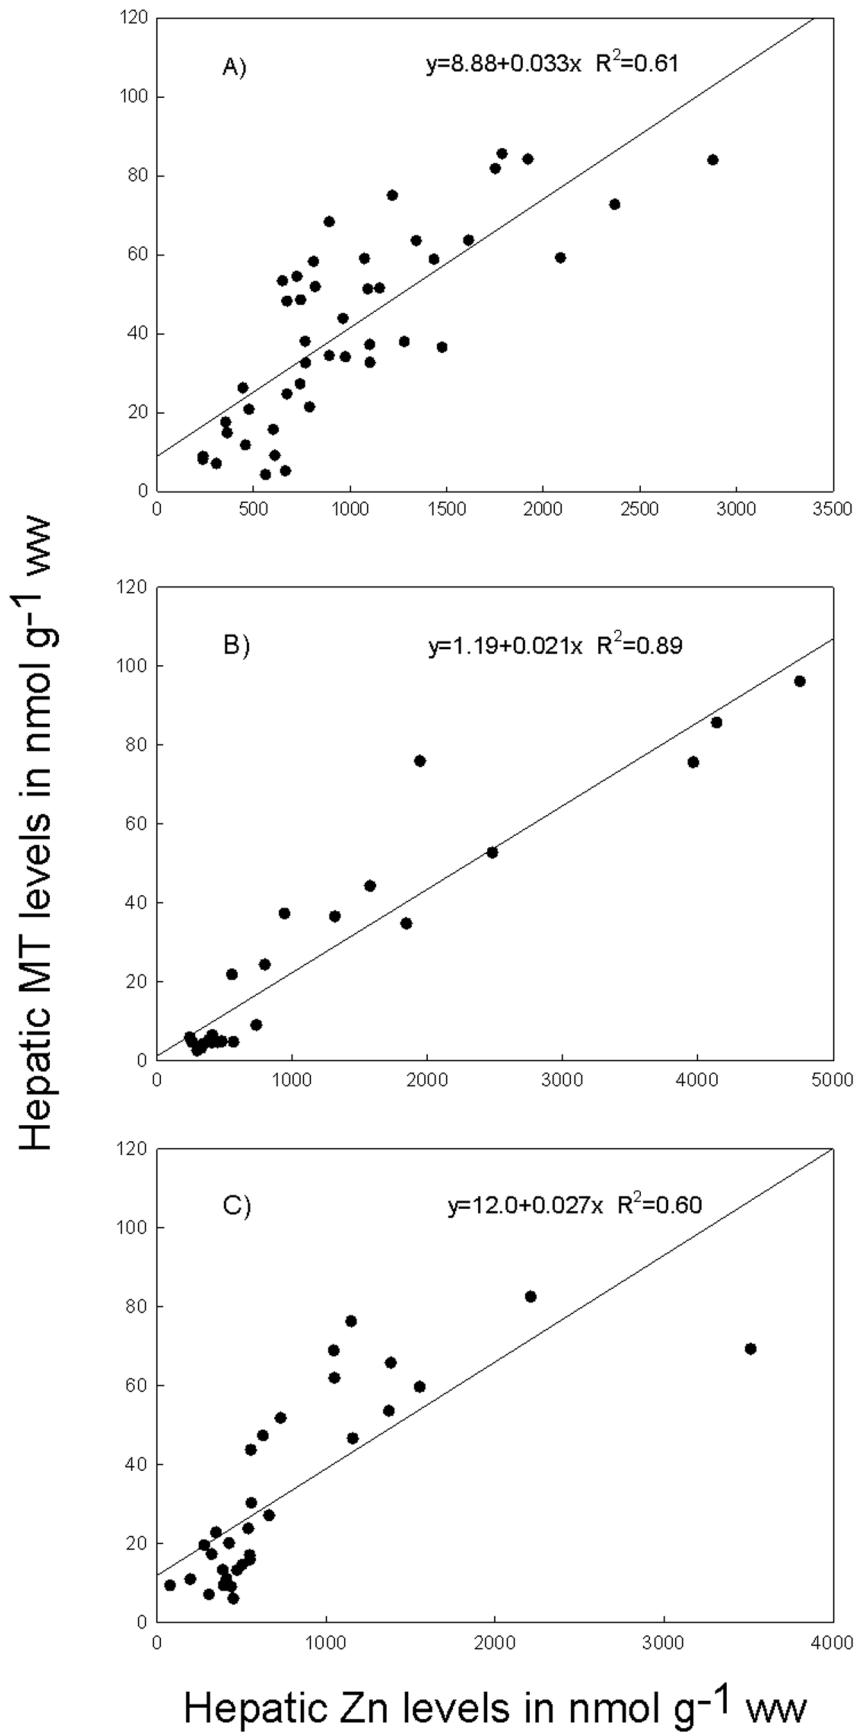

**Figure 4. Relationship between the hepatic Zn and MT level in the three fish species. (a) Roach; (b) Perch; (c) Gudgeon.**  
 doi:10.1371/journal.pone.0060805.g004

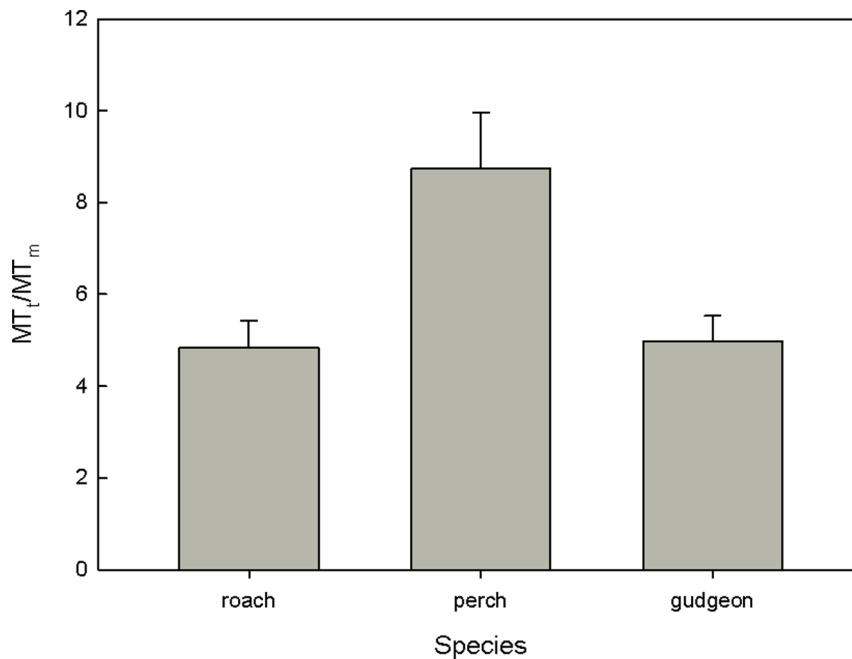

**Figure 5. Ratio of theoretical hepatic MT/measured hepatic MT for the three fish species.**  
doi:10.1371/journal.pone.0060805.g005

that was significantly contributing in the linear regression to the MT levels was Zn. However, Zn was strongly correlated with Cd and including only Cd in the model also revealed significant relationships with  $R^2$  between 0.60 and 0.87. Figure 4 illustrates the relationship between hepatic zinc and MT levels for the three species. Figure 5 presents the  $MT_t/MT_m$  ratio for the three species. The higher the ratio the lower is the efficiency. Perch proved to induce lower MT levels compared to the two other species (ANOVA, figure 5).

Figure 6 summarizes the results of the different condition indices measured for the three fish species. Values were tested on significant differences with an ANOVA, followed by a Duncan's multiple range test. For Roach only significant differences were observed for HSI with lowest levels at site 3 and highest at site 4. From site 4 on HSI decreased more downstream. For Perch only K differed significantly among the sites with highest levels at site 5. For gudgeon no significant differences were found for none of the measured indices among the sites.

With regression analysis the individual K, HSI and GSI were related for each species to the individual hepatic metal concentration. For Roach a significant negative relationship was found between hepatic Cd and K although the  $R^2$  was only 0.16. For Perch significant but also rather weak, negative relationships were found between hepatic Cd and GSI and between hepatic Zn and K ( $R^2$  of respectively 0.14 and 0.17). Finally for gudgeon a significant negative relationship was found between hepatic Cd and HSI ( $R^2 = 0.19$ ).

Relating the  $MT_t/MT_m$ -ratio to the condition indices revealed only a significant negative relationship with K for perch ( $R^2 = 0.17$ ) and with HSI for gudgeon ( $R^2 = 0.25$ ).

## Discussion

Cd and Zn in surface water and sediment exceeded the Flemish and International quality standards [42,43] at all investigated sites, except the reference site. Also compared to other polluted sites the

measured environmental levels can be considered as very high [34,44,45] and among the highest levels reported before [46]. This was reflected in the hepatic Cd and Zn levels of the three fish species. Hepatic levels in roach ranged from 0.01 to 9.17  $\mu\text{g/g dw}$  for Cd, from 0.62 to 18.4  $\mu\text{g/g dw}$  for Cu and from 15.5 to 185  $\mu\text{g/g dw}$  for Zn. Cadmium and zinc levels measured in fish from the present study were comparable or slightly to much higher than the levels measured in liver from roach and perch from metal polluted sites in literature whereas copper levels were comparable to levels in fish from uncontaminated sites [19,31,32,47–50]. For gudgeon only data were found from the same pollution gradient but from another period and levels in the present study were slightly lower [31,32,51].

In the present study hepatic Cd and Zn levels were higher in perch than in gudgeon and roach at most of the sites. This was opposite to what was found by Blanchard et al [49], Teil et al. [52] and Szarek-Gwiazda et al [51] who all found equal or lower Cd and Zn levels in perch compared to roach but in their studies environmental levels were lower compared to the present study. Andres et al. [48] however, measured higher levels in roach than in perch at environmental levels comparable to the present study. We cannot find any explanation for these differences in literature. Although in most studies no biomagnification is observed for metals other than Hg [53], in the present study highest levels were measured in the piscivorous fish. A possible reason for the highest levels in perch is that this species could be less capable in eliminating the metals than the other two species.

Differences in hepatic MT levels among the three fish species were site-specific although at most sites MT levels were comparable between roach and gudgeon but much lower in perch. At the reference site average MT levels were 12.4, 3.65 and 13.9 nmol/g ww for roach, perch and gudgeon respectively.

MT levels in roach from the reference site were comparable to levels found in unexposed roach [54,55] or from a reference site in the same River basin [19]. Studies of hepatic MT levels in gudgeon could only be found from the same river basin [16,26].



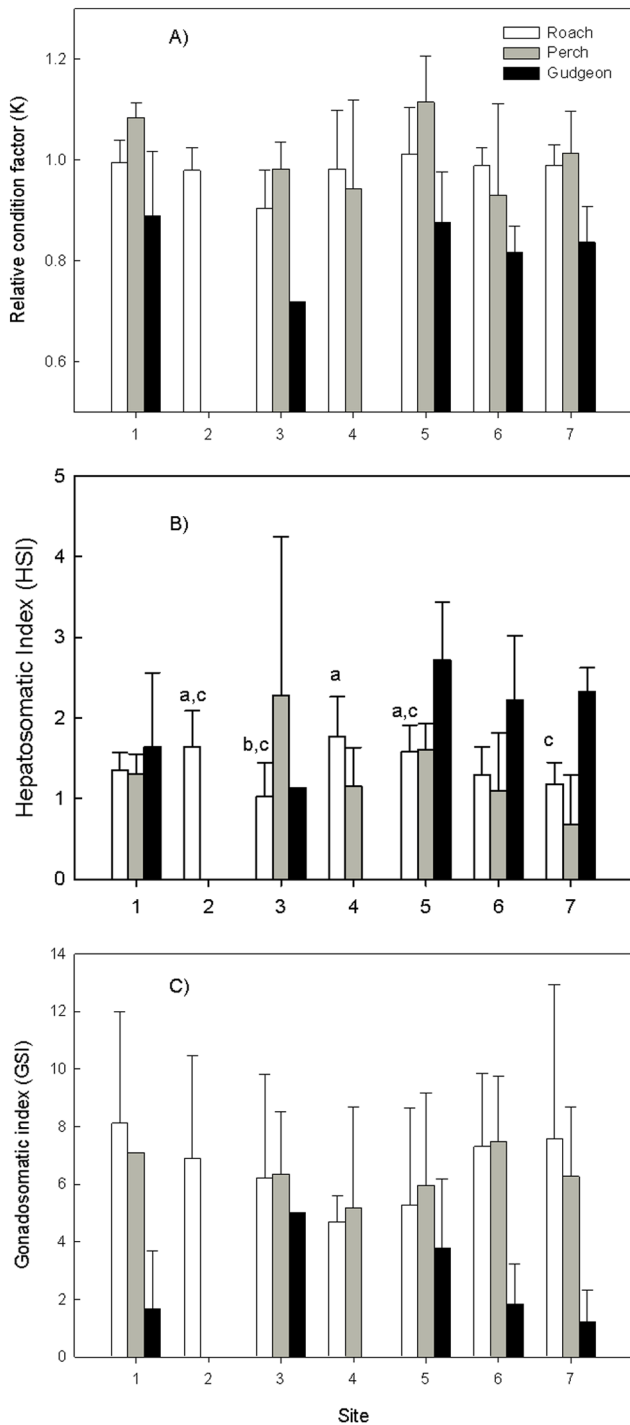

**Figure 6. Condition measures for the three fish species (mean ± standard dev.).** A) Relative condition factor; B) Hepatosomatic Index; C) Gonadosomatic Index. Different letters mean significant differences within species ( $p < 0.05$ )  
doi:10.1371/journal.pone.0060805.g006

Levels in the present study from the reference site were comparable or slightly lower than the levels found by Van Campenhout et al [16] and Knapen et al. [26] at reference sites. At the contaminated sites MT levels in gudgeon in the present study were slightly to much lower compared to the levels found by Van Campenhout et al [16], which measured MT levels in

gudgeon sampled in 1998 from the same contaminated sites. This is probably due to the decreased metal levels between the two study periods [16]. Levels in perch from our study were comparable to the levels found by Hogstrand et al. [56].

For all three species good to very good relationships were found between hepatic zinc and hepatic MT levels (figure 4). Several studies have investigated the effect of pollutants on the condition factor, HSI or GSI [e.g.19,57–59]. In the present study few differences in K, HSI or GSI were found among the sites for the different species.

Few significant and rather weak relationships were found between hepatic metal levels and condition indices. Ozmen et al. [60] found a reduced condition factor (CF) in carp captured at sites polluted with various contaminants including metals. A strong significant inverse relationship between CF and Cd concentration in liver of brown trout was found in a study of Clements and Rees [57]. Reynders et al. [19] found significant differences in CF of caged carp among sites but no significant relationship with accumulated metal. In a study of Bervoets et al. [61] condition factor was significantly related to metal load in the kidney but not in the other tissues. Knapen et al. [31] however, found significant differences in K for gudgeon along the same pollution gradient and reference site. However, lowest K was observed at the reference site and the least contaminated site of the gradient. Other studies did not find any relationships between environmental pollution and condition factor in fish [59,62]. In the present study the described variation in CF by hepatic metal levels was rather low, which can be attributed to other factors than (metal) pollution such as habitat quality and food availability [63].

A negative but weak relationship was found for gudgeon between hepatic Cd and the hepatosomatic index. This is in contrast to what was found by Ozmen et al. [60] and Bervoets et al. [61] who found a positive relationship between hepatic Cd levels and HSI in carp. However, Pereira et al. [64] measured a decreased HSI in winter flounder (*Pleuronectes americanus*) exposed to high cadmium concentrations for 71 days.

Since MTs are also induced by Hg and Ag, the approach of the MTt/MTm-ratio is only valid in a study area with low levels of those metals. In the present study we Hg and Ag were measured in the livers (data not shown) but levels were not significant among sites and species and generally very low or often even below the detection limit. Moreover, from the database of Flemish Environment Agency (www.vmm.be) it was obvious that concentrations of both metals were low in the pollution gradient.

If we compare the ratios of the theoretical over the actual MT levels perch proved to induce less MTs compared to the two other species. From this observation we would expect that perch is more sensitive to the metal pollution than the other two species. This was however not tested in the present study and relationships between the MTt/MTm-ratio and condition indices were non-significant or only weak relationships were found such as for perch with K and for gudgeon with the HSI. The absence of clear relationships between the MTt/MTm-ratio, which can be considered as a measure for sensitivity could be due to other factors influencing those indicators. Possibly other sub-lethal endpoints such as growth or reproduction should be selected in order to assess the protective effect of MT on fish condition or health.

From this study we can conclude that different fish species exposed within a same pollution gradient differentially accumulate metals and differentially induce metal binding proteins. Perch accumulated highest levels of Cd and Zn but showed the lowest detoxification capacity. Only few and weak relationships between detoxification capacity and measured endpoints could be found.

Probably more sensitive chronic effects have to be studied that are less affected by other environmental factors.

## Acknowledgments

We thank Tine Moermans, Tom De Bie, Liesbeth, Bruyndoncx, Veele Mees, and Judith Voets for assistance in the field and/or the laboratory.

## References

- De Jonge M, Blust R, Bervoets L (2010) The relation between Acid Volatile Sulfides (AVS) and metal accumulation in aquatic invertebrates: Implications of feeding behavior and ecology. *Environ Pollut* 158: 1381-1391.
- Hutchinson SM, Rothwell JJ (2008) Mobilisation of sediment-associated metals from historical Pb working sites on the River Sheaf, Sheffield, UK. *Environ Pollut* 155, 61-71.
- Nguyen HL, Braun M, Szaloki I, Baeyens W, Van Grieken R, et al. (2009) Tracing the Metal Pollution History of the Tisza River Through the Analysis of a Sediment Depth Profile. *Water Air Soil Poll* 200: 119-132.
- Dallinger R, Kautzky H (1985) The importance of contaminated food for the uptake of heavy metals by rainbow trout (*Salmo gairdneri*): a field study. *Oecologia* 67: 82-89.
- Chowdhury MJ, Bucking C, Wood C (2008) Pre-exposure to waterborne nickel downregulates gastrointestinal nickel uptake in rainbow trout: Indirect evidence for nickel essentiality. *Environ Sci Technol* 42: 1359-1364.
- Van Campenhout K, Bervoets L, Redeker ES, Blust R (2009) A kinetic model for the relative contribution of waterborne and dietary cadmium and zinc in the common carp (*Cyprinus carpio*). *Environ Toxicol Chem* 28: 209-219.
- Dallinger R, Egg M, Kock G, Hofer R (1997) The role of metallothionein in cadmium accumulation of Arctic char (*Salvelinus alpinus*) from high alpine lakes. *Aquat Toxicol* 38: 47-66
- Rainbow PS (2007) Trace metal bioaccumulation: models, metabolic availability and toxicity. *Environ Int* 33:576-582.
- Van Campenhout K, Infante HE, Hoff PT, Moens L, Goemans G, et al. (2010) Cytosolic distribution of Cd, Cu and Zn, and metallothionein levels in relation to physiological changes in gibel carp (*Carassius auratus gibelio*) from metal-impacted habitats. *Ecotox Environ Safe* 73: 296-305.
- Coyle P, Philcox JC, Carey LC, Rofe AM (2002) Metallothionein: The multipurpose protein. *Cell Mol Life Sci* 59: 627-647.
- Cosson RP (1994) Heavy metal intracellular balance and relationship with metallothionein induction in the liver of carp after contamination by silver, cadmium and mercury following or not pretreatment by zinc. *Biometals* 7: 9-19.
- Chowdhury MJ, Baldissarroto B, Wood CM (2005) Tissue-specific cadmium and metallothionein levels in rainbow trout chronically acclimated to waterborne or dietary cadmium. *Arch Environ Con Tox* 48: 381-390.
- De Boeck G, Ngo TTH, Van Campenhout K, Blust R (2003) Differential metallothionein induction patterns in three freshwater fish during sublethal copper exposure. *Aquat Toxicol* 65: 413-424.
- Costa PM, Repolho T, Caeiro S, Diniz ME, Moura I, et al. (2008) Modelling metallothionein induction in the liver of *Sparus aurata* exposed to metal-contaminated sediments. *Ecotox Environ Safe* 71: 117-124
- Olsvik PA, Hindar K, Zachariassen KE, Andersen RA (2001) Brown trout (*Salmo trutta*) metallothioneins as biomarkers for metal exposure in two Norwegian rivers. *Biomarkers* 6: 274-288.
- Van Campenhout K, Bervoets L, Blust R (2003) Metallothionein concentrations in natural populations of gudgeon (*Gobio gobio*): relationship with metal concentrations in tissues and environment. *Environ Toxicol Chem* 22:1548-1555.
- Van Campenhout K, Infante HG, Goemans G, Belpaire C, Adams F, et al. (2008) A field survey of metal binding to metallothionein and other cytosolic ligands in liver of eels using an on-line isotope dilution method in combination with size exclusion (SE) high pressure liquid chromatography (HPLC) coupled to Inductively Coupled Plasma time-of-flight Mass Spectrometry (ICP-TOFMS). *Sci Total Environ* 394: 379-389.
- Bird DJ, Rottchell JM, Hesp SA, Newton LC, Hall NG, et al. (2008) To what extent are hepatic concentrations of heavy metals in *Anguilla anguilla* at a site in a contaminated estuary related to body size and age and reflected in the metallothionein concentrations? *Environ Pollut* 151: 641-651.
- Reynders H, Bervoets L, Gelders M, De Coen WM, Blust R (2008) Accumulation and effects of metals in caged carp and resident roach along a metal pollution gradient *Sci Total Environ* 391: 82-95.
- Mieiro CL, Bervoets L, Joosen S, Blust R, Duarte AC, et al. (2011) Metallothioneins failed to reflect mercury external levels of exposure and bioaccumulation in marine fish – Considerations on tissue and species specific responses. *Chemosphere* 85:114-121.
- AllenGil SM, Martinov VG (1995) Heavy-metal burdens in 9 species of freshwater and anadromous fish from the Pechora River, Northern Russia. *Sci Total Environ* 160-61: 653-659.
- Terra BF, Araujo FG, Calza CF, Lopes RT, Teixeira TP (2008) Heavy metal in tissues of three fish species from different trophic levels in a Tropical Brazilian River. *Water Air and Soil Poll* 187: 275-284.
- Wang YM, Cheng P, Cui RN, Si WT, Zhang YM, et al. (2010) Heavy metal concentrations in water, sediment, and tissues of two fish species (*Triplophysa pappenheimi*, *Gobio hwanghensis*) from the Lanzhou section of the Yellow River, China. *Environ Monit Assess* 165: 97-102.
- Weis P, Ashley JTF (2007) Contaminants in fish of the Hackensack meadowlands, New Jersey: Size, sex, and seasonal relationships as related to health risks. *Arch Environ Con Tox* 52:80-89.
- Fabrik I, Svobodova Z, Adam V, Krizkova S, Trnkova L, et al. (2008) Metallothionein levels in sperm of various fish species. *J Appl Ichthyol* 24: 522-525.
- Knapen D, Bervoets L, Verheyen E, Blust R (2004) Resistance to water pollution in natural gudgeon (*Gobio gobio*) populations may be due to genetic adaptation. *Aquat Toxicol* 67: 155-165.
- Olsson PE, Kille P (1997) Functional comparison of the metal-regulated transcriptional control regions of metallothionein genes from cadmium-sensitive and tolerant fish species. *Biochim Biophys Acta* 1350: 325-334.
- Bervoets L, Blust R (2003) Metal concentrations in water, sediment and gudgeon (*Gobio gobio*) from a pollution gradient: relationship with fish condition factor. *Environ Pollut* 126: 9-19.
- Cooley HM, Evans RE, Klavervkamp JF (2002) Baseline measurements of indicators for sublethal effects of metals in lake whitefish (*Coregonus clupeaformis*). *Arch Environ Con Tox* 43: 418-423.
- Fernandes C, Fontainhas-Fernandes A, Rocha E, Salgado MA (2008) Monitoring pollution in Esmoriz-Paramos lagoon, Portugal: Liver histological and biochemical effects in *Liza saliens*. *Environ Monit Assess* 145:315-322.
- Knapen D, De Wolf H, Knaepkens G, Bervoets L, Eens M, et al. (2009) Historical metal pollution in natural gudgeon populations: inferences from allozyme, microsatellite and condition factor analysis. *Aquat Toxicol* 95: 17-26.
- Bervoets L, Knaepkens G, Eens M, Blust R (2005) Fish community responses to metal pollution. *Environ Pollut* 138: 338-349.
- De Cooman W, Seuntjens P, Bervoets L, Panis LI, De Wit M, et al. (1995) Research on the spatial variability of three sediment types in Flanders. *Contaminated Soil* 95:191-192.
- Bervoets L, Solis D, Romero AM, Van Damme PA, Ollevier F. 1998. Trace metal levels in chironomid larvae (Chironomidae, Diptera) and sediments from a Bolivian River: impact of mining activities. *Ecotox Environ Safe* 41: 275-283.
- Tessier A, Campbell PGC, Auclair JC, Bisson M (1984) Relationships between the partitioning of trace-metals in sediments and their accumulation in the tissues of the fresh-water mollusk *Elliptio complanata* in a mining area. *Can J Fish Aquat Sci* 41:1463-1472.
- De Wit M, Blust R (1998) Determination of metals in saline and biological matrices by axial inductively coupled plasma atomic emission spectrometry using microcentric nebulization. *J Anal Atom Spectrom* 13: 515-520.
- Klein D, Sato S, Summer KH (1994) Quantification of oxidized metallothionein in biological material by a Cd saturation method. *Anal Biochem* 221:405-409.
- Kito H, Ose Y, Mizuhira V, Sato T, Ishikawa T, et al. (1982) Separation and purification of (Cd, Cu, Zn)-metallothionein in carp hepato-pancreas. *Comp Biochem Phys C* 73: 121-127.
- Bienengraber M, Forderkuz S, Klein D, Summer KH (1995) Determination of Cu-containing metallothionein: Comparison of Ag saturation assay, thiomolybdate assay, and enzyme-linked immunosorbent assay. *Anal Biochem* 228:69-73.
- Bolger T, Connolly PL (1989) The selection of suitable indexes for the measurement and analysis of fish condition. *J Fish Biol* 34: 171-182.
- Le Cren ED (1951) The length - weight relationship and seasonal cycle in gonad weight and condition in the perch (*Perca fluviatilis*). *J Anim Ecol* 20: 201-219.
- MacDonald DD, Ingersoll CG, Berger TA (2000) Development and evaluation of consensus-based sediment quality guidelines for freshwater ecosystems. *Arch Environ Con Tox* 39: 20-31.
- U.S. Environmental Protection Agency (1999) National recommended water quality criteria—Correction: EPA 822/Z-99-001. Washington, DC.
- De Jonge M, Eyckmans M, Blust R, Bervoets L (2011) Are accumulated sulfide-bound metals metabolically available in the benthic oligochaete *Tubifex tubifex*? *Environ Sci Technol* 45: 3131-3137.
- Maceda-Veiga A, Monroy M, de Sostoa A (2012) Metal bioaccumulation in the Mediterranean barbel (*Barbus meridionalis*) in a Mediterranean River receiving effluents from urban and industrial wastewater treatment plants. *Ecotox Environ Safe* 76:93-101.
- Aleksander-Kwarczak U, Helios-Rybicka E (2009) Contaminated sediments as a potential source of Zn, Pb, and Cd for a river system in the historical metalliferous ore mining and smelting industry area of South Poland. *J Soil Sediment* 9:13-22.

## Author Contributions

Conceived and designed the experiments: LB RB. Performed the experiments: LB KVC DK. Analyzed the data: LB DK MDJ. Contributed reagents/materials/analysis tools: LB RB . Wrote the paper: LB DK MDJ.

47. Altug G, Okgerman H (2008) Levels of some toxic elements in the surface sediment and some biota from the Sapanca Lake, Turkey. *Fresen Environ Bull* 17: 24-28.
48. Andres S, Ribeyre F, Tourencq JN, Boudou A (2000) Interspecific comparison of cadmium and zinc contamination in the organs of four fish species along a polymetallic pollution gradient (Lot River, France). *Sci Total Environ* 248: 11-25.
49. Blanchard M, Teil MJ, Carru AM, Garban B, Ollivon D, et al. (1999). Biota contamination by PCBs and trace metals in the freshwater estuary of the River Seine (France). *Hydrobiologia* 400:149-154.
50. Szarek-Gwiazda E, Amirowicz A (2006) Bioaccumulation of trace elements in roach, silver bream, rudd, and perch living in an inundated opencast sulphur mine. *Aquat Ecol* 40: 221-236.
51. Knapen D, Reynders H, Bervoets L, Verheyen E, Blust R (2007) Metallothionein gene and protein expression as a biomarker for metal pollution in natural gudgeon populations. *Aquat Toxicol* 82: 163-172.
52. Teil MJ, Blanchard M, Carru AM, Chesterikoff A, Chevreuil M (1996) Partition of metallic and organochlorinated pollutants and monoorthosubstituted PCB pattern in the trophic web from different areas of the river Seine. *Sci Total Environ* 181:111-123.
53. Gray JS (2002) Biomagnification in marine systems. The perspective of an ecologist. *Mar Pollut Bull* 45: 46-52.
54. Paris-Palacios S, Biagiatti-Risbourg S, Fouley A, Vernet G (2000) Metallothioneins in liver of *Rutilus rutilus* exposed to Cu<sup>2+</sup>. Analysis by metal summation, SH determination and spectrofluorimetry. *Comp Biochem Phys C* 126: 113-122.
55. Paris-Palacios S, Biagiatti-Risbourg S, Vernet G (2003) Metallothionein induction related to hepatic structural perturbations and antioxidative defences in roach (*Rutilus rutilus*) exposed to the fungicide procymidone. *Biomarkers* 8:128-141.
56. Hogstrand C, Lithner G, Haux C (1989) Relationship between metallothionein, copper and zinc in perch (*Perca fluviatilis*) environmentally exposed to heavy-metals. *Mar Environ Res* 28:179-182.
57. Clements WH, Rees DE (1997) Effects of heavy metals on prey abundance, feeding habits, and metal uptake of brown trout in the Arkansas River, Colorado. *Trans Am Fish Soc* 126: 774-785.
58. De la Torre FR, Ferrari L, Salibian A (2000) Long-term in situ toxicity bioassays of the Reconquista River (Argentina) water with *Cyprinus carpio* as sentinel organism. *Water Air Soil Poll.* 121: 205-215.
59. Dethloff GM, Bailey HC, Maier KJ (2001) Effects of dissolved copper on select haematological, biochemical, and immunological parameters of wild rainbow trout (*Oncorhynchus mykiss*). *Arch Environ Con Tox* 40, 371-380.
60. Ozmen M, Gungordu A, Kucukbay FZ, Guler RE (2006) Monitoring the effects of water pollution on *Cyprinus carpio* in Karakaya Dam Lake, Turkey. *Ecotoxicology* 15: 157-169.
61. Bervoets L, Van Campenhout K, Reynders H, Knapen D, Covaci A, et al. (2009) Bioaccumulation of micropollutants and biomarker responses in caged carp (*Cyprinus carpio*). *Ecotox Environ Safe* 72: 720-728.
62. Farag AM, Woodward DF, Goldstein JN, Brumbaugh W, Meyer JS (1998) Concentrations of metals associated with mining waste in sediments, biofilm, benthic macroinvertebrates, and fish from the Coeur d'Alene River Basin, Idaho. *Arch Environ Con Tox* 34, 119-127.
63. Lobon-Cervia J, Montanes C, DeSostoa A (1991) Influence of environment upon the life history of gudgeon, *Gobio gobio* (L.) - a recent and successful colonizer of the Iberian Peninsula. *J Fish Biol* 39: 285-300.
64. Pereira JJ, Mercaldoallen R, Kuropat C, Luedke D, Sennfelder G (1993) Effect of cadmium accumulation on serum vitellogenin levels and hepatosomatic and gonadosomatic indexes of winter flounder (*Pleuronectes-americanus*). *Arch Environ Con. Toxicol* 4: 427-431.
65. Canadian Council of Ministers of the Environment (1999) Canadian environmental quality guidelines: Winnipeg, MB.
66. Flemish Government (2000) Besluit van de Vlaamse regering van 1 juni 1995 houdende vaststelling van het Vlaamse reglement betreffende de milieuvergunning (Vlarem), zoals gewijzigd bij besluit van 17 juli 2000. *Belgisch Staatsblad*, 5 augustus 2000 (in Dutch).
